# Supplementary material
Source: PubMed Central journal article supplement (PMC7592882)
Supplement: ehp6500.s001.acco.pdf [file ehp6500.s001.acco.pdf]

**Note to readers with disabilities:** *EHP* strives to ensure that all journal content is accessible to all readers. However, some figures and Supplemental Material published in *EHP* articles may not conform to [508 standards](#) due to the complexity of the information being presented. If you need assistance accessing journal content, please contact [ehp508@niehs.nih.gov](mailto:ehp508@niehs.nih.gov). Our staff will work with you to assess and meet your accessibility needs within 3 working days.

### **Supplemental Material**

#### **Drivers of and Obstacles to the Adoption of Toxicogenomics for Chemical Risk Assessment: Insights from Social Science Perspectives**

Guillaume Pain, Gordon Hickey, Matthieu Mondou, Doug Crump, Markus Hecker, Niladri Basu, and Steven Maguire

#### **Table of Contents**

**Table S1.** Quality control criteria employed in this study.

**Table S2.** Peer-reviewed journals included in data collection.

**Table S3.** Books included in data collection.

**Table S4.** Authoritative national sources, specialized associations, and international institutions included in data collection.

**Table S5.** Sources making up the corpus of texts analyzed.

**Table S6.** First, median, and last year of mention of drivers and obstacles.

#### **References**

**Additional File-** Excel Document

**Table S1: Quality control criteria employed in this study**

This table synthesizes applicable criteria from the Equator Network: O'Brien et al.'s (2014) 'standards for reporting qualitative research (SRQR)', Tong et al.'s (2007, 2012) 'consolidated criteria for reporting qualitative studies (COREQ)' and 'enhancing transparency in reporting the synthesis of qualitative research (ENTREQ)', Clark's (2003) 'Relevance, Appropriateness, Transparency, and Soundness (RATS)' criteria, and Malterud's (2001) qualitative research standards.

| <i>Criteria &amp; associated questions</i>                                                                                                    | <i>Answer</i>                                                                                                                                                                                                                                                                                                               |
|-----------------------------------------------------------------------------------------------------------------------------------------------|-----------------------------------------------------------------------------------------------------------------------------------------------------------------------------------------------------------------------------------------------------------------------------------------------------------------------------|
| <b>Domain 1: Relevance of study question</b>                                                                                                  |                                                                                                                                                                                                                                                                                                                             |
| Is it important for medicine or public health?                                                                                                | Yes. Our research questions relate to the challenge of assessing tens of thousands of data-poor chemicals and understanding why the adoption of alternative testing strategies by regulators is taking more time than expected.                                                                                             |
| Is it justified and linked to existing knowledge base (literature, theory, practice)?                                                         | Yes. The rationale for our research questions is explicitly grounded in extant research.                                                                                                                                                                                                                                    |
| <b>Domain 2: Appropriateness of qualitative method</b>                                                                                        |                                                                                                                                                                                                                                                                                                                             |
| Is qualitative methodology the best approach for the study aims?                                                                              | Yes. A qualitative study is the most appropriate method to build a comprehensive compendium of drivers and obstacles to the adoption of toxicogenomics; and the most appropriate approach to interrogating these drivers and obstacles through the lenses of established frameworks addressing the adoption of innovations. |
| Why was a particular method chosen?                                                                                                           | We analyzed the contents of published articles and documents produced by the toxicology and/or regulatory community to ensure that our sources and the drivers and obstacles we extracted from them reflect the concepts and vocabulary of these communities.                                                               |
| <b>Domain 3: Research team and reflexivity</b>                                                                                                |                                                                                                                                                                                                                                                                                                                             |
| Credentials – What were the research team's credentials? E.g. PhD, MD                                                                         | All seven team members involved in data collection and analysis hold PhDs. Five are Associate Professors or Full Professors.                                                                                                                                                                                                |
| Occupation – What was their occupation at the time of the study?                                                                              | Two postdoctoral researchers and five tenured professors.                                                                                                                                                                                                                                                                   |
| Experience and training – What experience or training did the researcher have?                                                                | All team members are trained toxicology, management, and policy scientists. Team members involved in data collection and analysis total 60+ years of cumulated qualitative research experience.                                                                                                                             |
| Do the researcher(s) critically examine their own influence on the formulation of the research question, data collection, and interpretation? | Yes. Social scientists purposely conducted this study and leveraged established frameworks addressing the adoption of innovations to provide guidance to the natural scientists promoting new toxicogenomics tools.                                                                                                         |
| Do the researchers occupy dual roles (clinician and researcher)?                                                                              | No. All team members are researchers. None are clinicians.                                                                                                                                                                                                                                                                  |
| Was trustworthiness of data checked?                                                                                                          | Yes. Coders and auditors met regularly during the study to verify data collection and analysis, with emphasis on codes, categories, and findings.                                                                                                                                                                           |
| Was an audit trail or triangulation employed?                                                                                                 | Yes. In addition to the audit meetings above, the team employed triangulation across multiple data sources: multiple references support all codes and categories.                                                                                                                                                           |
| Are findings presented with reference to existing theoretical and applied literature?                                                         | Yes. One key purpose of the study was to relate the literature on toxicogenomics adoption with established innovation adoption frameworks. In turn, these theories                                                                                                                                                          |

|                                                                                                                                                                                                  |                                                                                                                                                                                                                                                                                                                                |
|--------------------------------------------------------------------------------------------------------------------------------------------------------------------------------------------------|--------------------------------------------------------------------------------------------------------------------------------------------------------------------------------------------------------------------------------------------------------------------------------------------------------------------------------|
|                                                                                                                                                                                                  | feed into all findings, which convey practical implications for the adoption of toxicogenomics and other alternative testing strategies.                                                                                                                                                                                       |
| <b>Domain 4: Data collection</b>                                                                                                                                                                 |                                                                                                                                                                                                                                                                                                                                |
| Methodological orientation and Theory – What methodological orientation was stated to underpin the study? E.g. grounded theory, discourse analysis, ethnography, phenomenology, content analysis | We employed open coding (as used in grounded theory building) to identify key categories of drivers and obstacles to toxicogenomics adoption, which we then interpreted in light of established frameworks addressing the adoption of innovations.                                                                             |
| Source selection - How were sources selected? Are criteria for data collection explained and justified? Was collection of data systematic and comprehensive?                                     | We explain source selection, data collection and inclusion criteria in detail in the methods section.                                                                                                                                                                                                                          |
| <b>Domain 5: Analysis and findings</b>                                                                                                                                                           |                                                                                                                                                                                                                                                                                                                                |
| Derivation of themes – Were themes identified in advance or derived from the data? How were themes derived from the data?                                                                        | We detail data analysis in the methods section. We derived categories of drivers and obstacles from the data, using concepts and vocabulary of the toxicology community. We then interrogate these findings using pre-established concepts from frameworks of innovation adoption that are widely used in the social sciences. |
| Were negative or deviant cases analysed?                                                                                                                                                         | Yes. We included all special cases in the study.                                                                                                                                                                                                                                                                               |
| Were alternative explanations sought?                                                                                                                                                            | Yes. Alternative explanations are a central contribution of this study. We first present drivers and obstacles in the concepts and vocabulary of the toxicology community, then analyze them through the perspectives of two different established frameworks addressing the adoption of innovations.                          |
| Are the interpretations clearly presented and adequately supported by the evidence?                                                                                                              | Yes. Interpretations are presented in the results section.                                                                                                                                                                                                                                                                     |
| Reporting - Quotes presented – Were quotes presented to illustrate the themes / findings? Was each quotation identified?                                                                         | Yes. We use referenced quotes to clarify our inclusion criteria for drivers and obstacles. We selected quotes based on how illustrative they are.                                                                                                                                                                              |
| Reporting - Data and findings consistency – Was there consistency between the data presented and the findings?                                                                                   | Yes. We have detailed our analysis in the methods section so that readers can track the process linking data to findings.                                                                                                                                                                                                      |
| Reporting - Clarity of major categories – Were major categories clearly presented in the findings?                                                                                               | Yes. Major categories are clearly presented in the form of the most salient drivers and obstacles.                                                                                                                                                                                                                             |
| Reporting - Clarity of minor categories – Is there a description of diverse cases or discussion of minor categories?                                                                             | Yes. Minor categories are mentioned and minimally described in the form of the least salient drivers and obstacles.                                                                                                                                                                                                            |

**Table S2: Peer-reviewed journals included in data collection**

---

|                                                                                         |                                                                                |                                                                              |
|-----------------------------------------------------------------------------------------|--------------------------------------------------------------------------------|------------------------------------------------------------------------------|
| <i>Alternatives to Animal Experimentation</i>                                           | <i>Harvard Environmental Law Review</i>                                        | <i>Pure and Applied Chemistry</i>                                            |
| <i>American Journal of Public Health</i>                                                | <i>Health, Risk &amp; Society</i>                                              | <i>Regulatory Toxicology and Pharmacology</i>                                |
| <i>Aquatic Toxicology</i>                                                               | <i>Human and Ecological Risk Assessment: An International Journal</i>          | <i>Review of European, Comparative &amp; International Environmental Law</i> |
| <i>Archives of Toxicology</i>                                                           |                                                                                |                                                                              |
| <i>Big Data &amp; Society</i>                                                           | <i>Integrated Environmental Assessment and Management</i>                      | <i>Risk Analysis</i>                                                         |
| <i>Biological Conservation</i>                                                          |                                                                                | <i>Science</i>                                                               |
| <i>Critical Reviews in Toxicology</i>                                                   | <i>International Journal of Toxicology</i>                                     | <i>Science and Public Policy</i>                                             |
| <i>Drug Discovery Today</i>                                                             | <i>Journal of European Public Policy</i>                                       | <i>Science of the Total Environment</i>                                      |
| <i>Ecotoxicology</i>                                                                    | <i>Journal of Nanoparticle Research</i>                                        | <i>Science, Technology, &amp; Human Values</i>                               |
| <i>Ecotoxicology and Environmental Safety</i>                                           | <i>Journal of Pharmacogenomics &amp; Pharmacoproteomics</i>                    | <i>Social Studies of Science</i>                                             |
| <i>Environmental Health Perspectives</i>                                                | <i>Journal of the American Water Resources Association</i>                     | <i>Stanford Law Review</i>                                                   |
| <i>Environmental Politics</i>                                                           |                                                                                | <i>Technological Forecasting and Social Change</i>                           |
| <i>Environmental Science &amp; Policy</i>                                               | <i>Journal of Toxicology and Environmental Health</i>                          |                                                                              |
| <i>Environmental Science and Pollution Research</i>                                     | <i>Molecular Carcinogenesis</i>                                                | <i>Technovation</i>                                                          |
| <i>Environmental Science &amp; Technology</i>                                           | <i>Mutation Research - Fundamental and Molecular Mechanisms of Mutagenesis</i> | <i>The Social Science Journal</i>                                            |
| <i>Environmental Toxicology and Chemistry</i>                                           | <i>Nature</i>                                                                  | <i>Toxicological Sciences</i>                                                |
| <i>European Journal of Pharmaceutics and Biopharmaceutics</i>                           | <i>Nature Biotechnology</i>                                                    | <i>Toxicology</i>                                                            |
|                                                                                         | <i>Nature Genetics</i>                                                         | <i>Toxicology in Vitro</i>                                                   |
|                                                                                         | <i>Nature Reviews Genetics</i>                                                 | <i>Toxicology Letters</i>                                                    |
| <i>European Journal of Public Health</i>                                                | <i>Nucleic Acids Research</i>                                                  | <i>Toxicology Research</i>                                                   |
| <i>European Journal of Risk Regulation</i>                                              | <i>Pharmacogenomics</i>                                                        | <i>Trends in Biotechnology</i>                                               |
| <i>Expert Opinion on Drug Safety</i>                                                    | <i>Progress in Biophysics &amp; Molecular Biology</i>                          | <i>Trends in Pharmacological Sciences</i>                                    |
| <i>Governance: An International Journal of Policy, Administration, and Institutions</i> |                                                                                | <i>Yale Journal on Regulation</i>                                            |

**Table S3: Books included in data collection**

---

- Ankley GT, Miracle AL, Perkins EJ, Daston GP, eds. 2008. Genomics in regulatory ecotoxicology: Applications and challenges. CRC Press ; SETAC: Boca Raton; Pensacola, FL.
- Burczynski ME, ed. 2003. An introduction to toxicogenomics. CRC Press: Boca Raton, FL.
- Eskes C, Whelan M, eds. 2016. Validation of alternative methods for toxicity testing. Springer:Switzerland.
- Inoue T, Pennie WD, eds. 2003. Toxicogenomics. Springer Verlag: Japan.
- Klaassen CD, Casarett LJ. 2008. Casarett and Doull's Toxicology. McGraw-Hill Professional Publishing: Blacklick, USA.
- Mendrick DL, Mattes WB, eds. 2008. Essential concepts in toxicogenomics. Humana Press, Springer: Totowa, NJ.
- Salem H, Katz SA. 1999. Toxicity assessment alternatives: Methods, issues, opportunities. Humana Press, Springer: Totowa, NJ.
- Sharp RR, Marchant GE, Grodsky JA. 2008. Genomics and environmental regulation: Science, ethics, and law. Johns Hopkins University Press: Baltimore, MD.

**Table S4: Authoritative national sources, specialized associations, and international institutions included in data collection**

|                                    |                                   |                                  |
|------------------------------------|-----------------------------------|----------------------------------|
| AltTox.org                         | Interagency Coordinating          | United Nations Environment       |
| Chemical Watch                     | Committee on the Validation of    | Programme                        |
| Environment and Climate Change     | Alternative Methods               | US Food and Drug Administration  |
| Canada                             | International Labour Organization | US Environmental Protection      |
| European Centre For Ecotoxicology  | NTP Interagency Center for the    | Agency                           |
| and toxicology of Chemicals        | Evaluation of Alternative         | US National Academies of         |
| European Centre for the Validation | Toxicological Methods             | Sciences, Engineering, and       |
| of Alternative Methods             | Organisation for Economic Co-     | Medicine                         |
| European Chemicals Agency          | operation and Development         | US National Institutes of Health |
| European Commission                | Public Health England             | US National Institute of         |
| Government of Canada               | Society for Environmental         | Environmental Health Sciences    |
| Health Canada                      | Toxicology and Chemistry          | US National Research Council     |
| Human Toxicology Project           | Society for Risk Analysis         | US National Toxicology Program   |
| Consortium                         | Society of Toxicology             | World Health Organization        |

**Table S5: Sources making up the corpus of texts analyzed**

- Andersen ME, Krewski D. 2010. The Vision of Toxicity Testing in the 21st Century: Moving from Discussion to Action. *Toxicological Sciences* 117:17–24; doi:10.1093/toxsci/kfq188.
- Ankley G, Daston GP, Degitz SJ, Denslow ND, Hoke RA, Kennedy SW, et al. 2006. Toxicogenomics in Regulatory Ecotoxicology. *Environmental Science & Technology* 40: 4055–4065.
- Bahamonde PA, Feswick A, Isaacs MA, Munkittrick KR, Martyniuk CJ. 2016. Defining the role of omics in assessing ecosystem health: Perspectives from the Canadian environmental monitoring program: Omics for ecosystem health. *Environmental Toxicology and Chemistry* 35:20–35; doi:10.1002/etc.3218.
- Balbus JM. 2005. Ushering in the New Toxicology: Toxicogenomics and the Public Interest. *Environmental Health Perspectives* 113:818–822; doi:10.1289/ehp.7732.
- Balbus JM, Environmental Defense. 2005. *Toxicogenomics: Harnessing the power of new technology*. Environmental Defense: New York, NY. 71 pp.
- Bergeson LL. 2008. Challenges in Applying Toxicogenomic Data in Federal Regulatory Settings. In: *Genomics and Environmental Regulation: Science, Ethics, and Law* (R.R. Sharp, G.E. Marchant, and J.A. Grodsky, eds). Johns Hopkins University Press: Baltimore. 67–80.
- Boverhof DR, Zacharewski TR. 2006. Toxicogenomics in Risk Assessment: Applications and Needs. *Toxicological Sciences* 89:352–360; doi:10.1093/toxsci/kfj018.
- Chen M, Zhang M, Borlak J, Tong W. 2012. A Decade of Toxicogenomic Research and Its Contribution to Toxicological Science. *Toxicological Sciences* 130:217–228; doi:10.1093/toxsci/kfs223.
- Dunn RT, Kolaja KL. 2003. Gene Expression Profile Databases in Toxicity Testing. In: *An Introduction to Toxicogenomics* (M.E. Burczynski, ed). Informa Healthcare, CRC Press: Boca Raton, FL. 213–224.
- ECETOC (European Centre for Ecotoxicology and Toxicology of Chemicals). 2007. Workshop on the Application of ‘Omic Technologies in Toxicology and Ecotoxicology: Case Studies and Risk Assessment, 6-7 December 2007, Malaga. ECETOC: Brussels, BE. 70 pp.
- ECHA (European Chemicals Agency). 2016. Topical Scientific Workshop on New Approach Methodologies in Regulatory Science - Background document. ECHA: Helsinki, FI. 19 pp.
- ECVAM (European Centre for the Validation of Alternative Methods), ICCVAM (Interagency Coordinating Committee on the Validation of Alternative Methods). 2003. Workshop on the Validation Principles for Toxicogenomics-Based Test Systems: An overview. ECVAM: Ispra, IT. 5 pp.
- Fent K, Sumpter JP. 2011. Progress and promises in toxicogenomics in aquatic toxicology: Is technical innovation driving scientific innovation? *Aquatic Toxicology* 105:25–39; doi:10.1016/j.aquatox.2011.06.008.
- Fielden MR, Zacharewski TR. 2001. Challenges and Limitations of Gene Expression Profiling in Mechanistic and Predictive Toxicology. *Toxicological Sciences* 60:6–10; doi:10.1093/toxsci/60.1.6.
- Freeman K. 2004. Toxicogenomics data: the road to acceptance. *Environmental Health Perspectives* 112: A678.
- Frueh FW. 2006. Impact of microarray data quality on genomic data submissions to the FDA. *Nature Biotechnology* 24:1105–1107; doi:10.1038/nbt0906-1105.
- Gant TW. 2016. Analysing Data: Towards developing a framework for transcriptomics and other Big Data analysis for regulatory application. ECHA: Helsinki, FI. 1 p.
- Gershon D. 2002. Toxicogenomics gains impetus. *Nature* 415:4–5; doi:10.1038/nj6869-04a.
- Government of Canada. 2016. *Integrating New Approach Methodologies within the CMP: Identifying Priorities for Risk Assessment, Existing Substances Risk Assessment Program*. Government of Canada: Ottawa, ON. 35 pp.
- Grodsky JA. 2007. Genomics and Toxic Torts: Dismantling the Risk-Injury Divide. *Stanford Law Review* 59: The Challenge of Modeling Dynamic Changes in Biological Systems, and the Reality of Low-Throughput Environmental Health Decision Making; doi:10.2307/40040398.
- Hartung T. 2011. From alternative methods to a new toxicology. *European Journal of Pharmaceutics and Biopharmaceutics* 77:338–349; doi:10.1016/j.ejpb.2010.12.027.

- 
- Hartung T. 2009. Toxicology for the twenty-first century. *Nature* 460: 208–212.
- Hattis D. 2009. High-Throughput Testing—The NRC Vision, The Challenge of Modeling Dynamic Changes in Biological Systems, and the Reality of Low-Throughput Environmental Health Decision Making. *Risk Analysis* 29:483–484; doi:10.1111/j.1539-6924.2008.01167.x.
- Iannaccone PM. 2001. Toxicogenomics: “The Call of the Wild Chip”. *Environmental health perspectives* 109: A8.
- IPCS (International Programme on Chemical Safety). 2003. Workshop report: Toxicogenomics and the risk assessment of chemicals for the protection of human health. WHO: Geneva, CH. 20 pp.
- Kramer JA, Kolaja KL. 2002. Toxicogenomics: an opportunity to optimise drug development and safety evaluation. *Expert Opinion on Drug Safety* 1:275–286; doi:10.1517/14740338.1.3.275.
- Krewski D, Andersen ME, Mantus E, Zeise L. 2009. Toxicity Testing in the 21st Century: Implications for Human Health Risk Assessment. *Risk Analysis* 29:474–479; doi:10.1111/j.1539-6924.2008.01150.x.
- Lühe A, Suter L, Ruepp S, Singer T, Weiser T, Albertini S. 2005. Toxicogenomics in the pharmaceutical industry: Hollow promises or real benefit? *Mutation Research/Fundamental and Molecular Mechanisms of Mutagenesis* 575:102–115; doi:10.1016/j.mrfmmm.2005.02.009.
- Malloy T, Zaunbrecher V, Beryt E, Judson R, Tice R, Allard P, et al. 2017. Advancing alternatives analysis: The role of predictive toxicology in selecting safer chemical products and processes. *Integrated Environmental Assessment and Management* 13:915–925; doi:10.1002/ieam.1923.
- NASEM (National Academies of Sciences, Engineering, and Medicine). 2017. Using 21st Century Science to Improve Risk-Related Evaluations. NASEM: Washington, DC. 38 pp.
- Nature Publishing Group. 2006. Making the most of microarrays. *Nature Biotechnology* 24:1039–1039; doi:10.1038/nbt0906-1039.
- NRC (National Research Council). 2007. *Toxicity Testing in the 21st Century: A Vision and a Strategy*. National Academies Press: Washington, DC. 216 pp.
- NRC (National Research Council). 2005. *Toxicogenomic Technologies and Risk Assessment of Environmental Carcinogens: A Workshop Summary*. National Academies Press: Washington, DC. 55 pp.
- NTP (National Toxicology Program). 2004. *A National Toxicology Program for the 21st Century -- A Roadmap for the Future*. NTP: Research Triangle Park, NC. 12 pp.
- OECD (Organization for Economic Cooperation and Development). 2010. *Report of The Focus Session on Current And Forthcoming Approaches for Chemical Safety and Animal Welfare*. OECD: Paris, FR. 30 pp.
- OECD (Organization for Economic Cooperation and Development). 2005. *Report of the OECD/IPCS workshop on toxicogenomics*. OECD: Paris, FR. 62 pp.
- Olden K, Guthrie J, Newton S. 2001. A bold new direction for environmental health research. *American Journal of Public Health* 91: 1964–1967.
- Olden K, Wilson S. 2000. Environmental health and genomics: visions and implications. *Nature Reviews Genetics* 1:149–153; doi:10.1038/35038586.
- Orphanides G. 2003. Toxicogenomics: challenges and opportunities. *Toxicology Letters* 140–141:145–148; doi:10.1016/S0378-4274(02)00500-3.
- Pennie W, Pettit SD, Lord PG. 2004. Toxicogenomics in Risk Assessment: An Overview of an HESI Collaborative Research Program. *Environmental Health Perspectives*; doi:10.1289/txg.6674.
- Pettit S, des Etages SA, Mylecraine L, Snyder R, Fostel J, Dunn RT, et al. 2010. Current and Future Applications of Toxicogenomics: Results Summary of a Survey from the HESI Genomics State of Science Subcommittee. *Environmental Health Perspectives* 118:992–997; doi:10.1289/ehp.0901501.
- Sauer UG, Deferme L, Gribaldo L, Hackermüller J, Tralau T, van Ravenzwaay B, et al. 2017. The challenge of the application of omics technologies in chemicals risk assessment: Background and outlook. *Regulatory Toxicology and Pharmacology*; doi:10.1016/j.yrtph.2017.09.020.
- SOT (Society of Toxicology). 2015. *Alternative Toxicity Test Methods: Reducing, Refining, and Replacing Animal Use for Safety Testing*. SOT: Reston, VA. 2 pp.
- Taylor CF, Paton NW, Lilley KS, Binz P-A, Jr RKJ, Jones AR, et al. 2007. The minimum information about a proteomics experiment (MIAPE). *Nature Biotechnology* 25:nbt1329; doi:10.1038/nbt1329.



- 
- Tralau T, Oelgeschläger M, Gürtler R, Heinemeyer G, Herzler M, Höfer T, et al. 2015. Regulatory toxicology in the twenty-first century: challenges, perspectives and possible solutions. *Archives of Toxicology* 89:823–850; doi:10.1007/s00204-015-1510-0.
- Trosko JE, Upham BL. 2010. A Paradigm Shift is Required for the Risk Assessment of Potential Human Health After Exposure to Low Level Chemical Exposures: A Response to the Toxicity Testing in the 21st Century Report. *International Journal of Toxicology* 29:344–357; doi:10.1177/1091581810371384.
- Tsuji JS, Garry MR. 2009. Advances in Toxicity Testing Herald Improvements and Challenges for Risk Assessment. *Risk Analysis* 29:490–491; doi:10.1111/j.1539-6924.2008.01170.x.
- Vachon J, Campagna C, Rodriguez MJ, Sirard M-A, Levallois P. 2017. Barriers to the use of toxicogenomics data in human health risk assessment: A survey of Canadian risk assessors. *Regulatory Toxicology and Pharmacology* 85:119–123; doi:10.1016/j.yrtph.2017.01.008.
- van Leeuwen K. 2007. Strategic Testing in REACH - A Testing Paradigm Shift. The McKim Conferences. The International QSAR Foundation: Knife River, MN. 30 pp.
- Villeneuve DL, Garcia-Reyero N, Escalon BL, Jensen KM, Cavallin JE, Makynen EA, et al. 2012. Ecotoxicogenomics to Support Ecological Risk Assessment: A Case Study with Bisphenol A in Fish. *Environmental Science & Technology* 46:51–59; doi:10.1021/es201150a.
- Wakefield J. 2003. Toxicogenomics: roadblocks and new directions. *Environmental Health Perspectives* 111: A334.
- Wilks MF, Roth N, Aicher L, Faust M, Papadaki P, Marchis A, et al. 2015. White paper on the promotion of an integrated risk assessment concept in European regulatory frameworks for chemicals. *Science of The Total Environment* 521:211–218; doi:10.1016/j.scitotenv.2015.03.065.
- Willett CE, Antczak P, Burgoon L, Falciani F, Gutsell S, Hodges G, et al. 2014. Using Adverse Outcome Pathways for Regulatory Applications. 9th World Congress on Alternatives to Animal Use in the Life Sciences: Prague, CZ. 1 p.
- Wittwehr C, Aladjov H, Ankley G, Byrne HJ, de Knecht J, Heinzle E, et al. 2017. How Adverse Outcome Pathways Can Aid the Development and Use of Computational Prediction Models for Regulatory Toxicology. *Toxicological Sciences* 155:326–336; doi:10.1093/toxsci/kfw207.
- Zaubrecher V, Beryt E, Parodi D, Telesca D, Doherty J, Malloy T, et al. 2017. Has Toxicity Testing Moved into the 21st Century? A Survey and Analysis of Perceptions in the Field of Toxicology. *Environmental Health Perspectives* 125; doi:10.1289/EHP1435.
- Zeiger E. 1999. Federal interagency activities toward validation and regulatory acceptance of alternative tests. In: *Toxicity Assessment Alternatives: Methods, Issues, Opportunities*. Humana Press, Springer: Totowa, NJ. 247–256.

**Table S6: First, median, and last year of mention of drivers and obstacles**

| Year                            | 1998     | 1999     | 2000     | 2001      | 2002     | 2003     | 2004     | 2005      | 2006      | 2007      | 2008     | 2009      | 2010      | 2011     | 2012     | 2013     | 2014     | 2015      | 2016     | 2017      | Total      |
|---------------------------------|----------|----------|----------|-----------|----------|----------|----------|-----------|-----------|-----------|----------|-----------|-----------|----------|----------|----------|----------|-----------|----------|-----------|------------|
| # of sources in corpus of texts | 0        | 1        | 1        | 3         | 2        | 5        | 3        | 5         | 4         | 5         | 1        | 4         | 5         | 1        | 2        | 0        | 1        | 3         | 4        | 6         | 56         |
| <b>Drivers</b>                  |          |          |          |           |          |          |          |           |           |           |          |           |           |          |          |          |          |           |          |           |            |
| D1                              | 0        | 0        | 0        | 2         | 2        | 2        | 1        | 2         | 1         | 3         | 1        | 3         | 3         | 2        | 1        | 0        | 0        | 2         | 1        | 0         | 26         |
| D2                              | 0        | 0        | 1        | 2         | 0        | 2        | 1        | 2         | 1         | 1         | 1        | 2         | 1         | 2        | 1        | 0        | 0        | 1         | 1        | 1         | 20         |
| D3                              | 0        | 0        | 1        | 2         | 0        | 1        | 0        | 1         | 1         | 2         | 0        | 1         | 1         | 0        | 1        | 0        | 0        | 1         | 2        | 2         | 16         |
| D4                              | 0        | 0        | 0        | 1         | 1        | 0        | 0        | 1         | 1         | 3         | 0        | 1         | 0         | 1        | 2        | 0        | 0        | 2         | 0        | 0         | 13         |
| D5                              | 0        | 0        | 1        | 1         | 1        | 3        | 0        | 2         | 0         | 2         | 0        | 1         | 0         | 0        | 0        | 0        | 0        | 1         | 0        | 0         | 12         |
| D6                              | 0        | 0        | 1        | 0         | 0        | 0        | 0        | 1         | 1         | 1         | 0        | 0         | 1         | 1        | 1        | 0        | 0        | 1         | 1        | 0         | 9          |
| D7                              | 0        | 0        | 0        | 1         | 0        | 1        | 0        | 0         | 0         | 0         | 0        | 1         | 1         | 1        | 0        | 0        | 0        | 1         | 0        | 0         | 6          |
| D8                              | 0        | 0        | 0        | 1         | 1        | 0        | 1        | 0         | 1         | 1         | 0        | 0         | 0         | 0        | 0        | 0        | 0        | 0         | 0        | 0         | 5          |
| D9                              | 0        | 0        | 0        | 0         | 0        | 0        | 0        | 1         | 1         | 0         | 0        | 0         | 0         | 1        | 0        | 0        | 0        | 0         | 1        | 0         | 4          |
| D10                             | 0        | 0        | 0        | 0         | 0        | 0        | 0        | 0         | 0         | 1         | 1        | 0         | 0         | 0        | 0        | 0        | 0        | 0         | 0        | 0         | 2          |
| D11                             | 0        | 0        | 0        | 0         | 0        | 0        | 0        | 0         | 0         | 0         | 0        | 0         | 0         | 0        | 0        | 0        | 0        | 1         | 0        | 0         | 1          |
| <b>Total</b>                    | <b>0</b> | <b>0</b> | <b>4</b> | <b>10</b> | <b>5</b> | <b>9</b> | <b>3</b> | <b>10</b> | <b>7</b>  | <b>14</b> | <b>3</b> | <b>9</b>  | <b>7</b>  | <b>8</b> | <b>6</b> | <b>0</b> | <b>0</b> | <b>10</b> | <b>6</b> | <b>3</b>  | <b>114</b> |
| <b>Obstacles</b>                |          |          |          |           |          |          |          |           |           |           |          |           |           |          |          |          |          |           |          |           |            |
| O1                              | 0        | 1        | 0        | 1         | 0        | 3        | 1        | 3         | 3         | 4         | 1        | 3         | 2         | 1        | 0        | 0        | 1        | 1         | 2        | 6         | 33         |
| O2                              | 0        | 0        | 1        | 1         | 0        | 2        | 2        | 3         | 2         | 2         | 0        | 2         | 2         | 1        | 1        | 0        | 0        | 0         | 2        | 1         | 22         |
| O3                              | 0        | 0        | 0        | 0         | 0        | 1        | 1        | 3         | 3         | 2         | 1        | 0         | 2         | 1        | 0        | 0        | 0        | 1         | 2        | 3         | 20         |
| O4                              | 0        | 1        | 0        | 1         | 0        | 1        | 0        | 3         | 1         | 0         | 0        | 0         | 0         | 1        | 0        | 0        | 0        | 1         | 1        | 2         | 12         |
| O5                              | 0        | 0        | 0        | 0         | 0        | 0        | 0        | 2         | 0         | 0         | 1        | 2         | 1         | 0        | 0        | 0        | 0        | 2         | 1        | 1         | 10         |
| O6                              | 0        | 0        | 0        | 0         | 0        | 0        | 0        | 2         | 1         | 2         | 0        | 1         | 1         | 0        | 0        | 0        | 0        | 0         | 0        | 1         | 8          |
| O7                              | 0        | 0        | 0        | 0         | 0        | 1        | 0        | 2         | 1         | 1         | 0        | 1         | 0         | 1        | 0        | 0        | 0        | 0         | 0        | 0         | 7          |
| O8                              | 0        | 0        | 0        | 0         | 0        | 0        | 0        | 1         | 1         | 1         | 0        | 1         | 1         | 0        | 0        | 0        | 0        | 0         | 0        | 1         | 6          |
| O9                              | 0        | 0        | 0        | 0         | 0        | 0        | 0        | 1         | 0         | 0         | 0        | 1         | 1         | 0        | 0        | 0        | 0        | 0         | 1        | 0         | 4          |
| O10                             | 0        | 0        | 0        | 0         | 0        | 0        | 0        | 0         | 0         | 1         | 0        | 0         | 2         | 0        | 0        | 0        | 0        | 0         | 0        | 1         | 4          |
| O11                             | 0        | 0        | 0        | 0         | 0        | 0        | 1        | 0         | 0         | 0         | 0        | 0         | 1         | 0        | 0        | 0        | 0        | 0         | 0        | 0         | 2          |
| O12                             | 0        | 0        | 0        | 0         | 0        | 1        | 0        | 0         | 0         | 0         | 1        | 0         | 0         | 0        | 0        | 0        | 0        | 0         | 0        | 0         | 2          |
| <b>Total</b>                    | <b>0</b> | <b>2</b> | <b>1</b> | <b>3</b>  | <b>0</b> | <b>9</b> | <b>5</b> | <b>20</b> | <b>12</b> | <b>13</b> | <b>4</b> | <b>11</b> | <b>13</b> | <b>5</b> | <b>1</b> | <b>0</b> | <b>1</b> | <b>5</b>  | <b>9</b> | <b>16</b> | <b>130</b> |

Key:     First year of mention        Median year of mention        Last year of mention

Notes:

**Drivers**

D1) Superior scientific understanding: Omics methods allow for a better understanding of health and ecological effects from exposures to chemicals

D2) New applications: Omics methods offer new applications in human and ecological toxicology

D3) Reduced cost & increased efficiency: Omics methods will reduce the cost and time, increase the efficiency and scale of testing

- D4) Scientific and technological advances: Scientific and technological advances enhance the capacity of omics methods to improve scientific understanding and generate new applications in toxicology
- D5) Belief in the potential of omics: Field actors express their belief in the potential and promise of omics methods
- D6) Stakeholder commitment & investment: Government and industry are committed to, and invest in, the development of omics methods
- D7) Reduced animal use: Omics methods are expected to reduce animal use in toxicity testing
- D8) Numerous untested chemicals: The high number of untested incumbent and new chemicals creates pressure for adopting new testing approaches
- D9) Enabling laws & regulations: New laws and regulations convey directions that foster omics methods
- D10) Accessibility of capabilities & resources: Omics tools and expertise are becoming more available
- D11) International collaboration & harmonization: International collaboration supports the harmonization of omics methods

### **Obstacles**

- O1) Insufficient validation: Omics methods are insufficiently validated, especially for regulatory uses
- O2) Complexity of interpretation: Interpretation of omics data is complex and needs clearer links to biological impacts
- O3) Lack of standardization: Omics methods need standardization
- O4) Lack of expertise: Field actors lack expertise and need training
- O5) Difficulty of coordination: The efforts of field actors lack coordination. Technical and IP rights issues with data sharing hinder coordination
- O6) Resistance to change: Field actors resist the use and adoption of omics methods
- O7) High level of required investment: Using omics requires significant investment
- O8) Lack of organizational support: There is a lack of funding, resources, and organizational support for omics methods
- O9) Uncertain economic benefits: The economic benefits of omics are uncertain
- O10) Inadequacy for some applications: There are some areas of toxicology where omics cannot be applied
- O11) Concerns about litigation: Actors are concerned with litigation from retrospective analysis
- O12) Frustrated expectations: Omics created unrealistic expectations which are not fulfilled

## SUPPLEMENTAL MATERIAL – REFERENCES

- Clark JP. 2003. 15: How to peer review a qualitative manuscript. In: *Peer Review in Health Sciences* (F. Godlee and T. Jefferson, eds). BMJ Books:London. 219–235.
- Malterud K. 2001. Qualitative research: standards, challenges, and guidelines. *The Lancet* 358:483–488; doi:10.1016/S0140-6736(01)05627-6.
- O’Brien BC, Harris IB, Beckman TJ, Reed DA, Cook DA. 2014. Standards for Reporting Qualitative Research: A Synthesis of Recommendations. *Academic Medicine* 89:1245–1251; doi:10.1097/ACM.0000000000000388.
- Tong A, Flemming K, McInnes E, Oliver S, Craig J. 2012. Enhancing transparency in reporting the synthesis of qualitative research: ENTREQ. *BMC Medical Research Methodology* 12; doi:10.1186/1471-2288-12-181.
- Tong A, Sainsbury P, Craig J. 2007. Consolidated criteria for reporting qualitative research (COREQ): a 32-item checklist for interviews and focus groups. *International Journal for Quality in Health Care* 19:349–357; doi:10.1093/intqhc/mzm042.
