# Supplementary material
Source: PubMed Central journal article supplement (PMC7592882)
Supplement: ehp6500.smcontents.508.pdf [file ehp6500.smcontents.508.pdf]

**Note to readers with disabilities:** *EHP* strives to ensure that all journal content is accessible to all readers. However, some figures and Supplemental Material published in *EHP* articles may not conform to [508 standards](#) due to the complexity of the information being presented. If you need assistance accessing journal content, please contact [ehp508@niehs.nih.gov](mailto:ehp508@niehs.nih.gov). Our staff will work with you to assess and meet your accessibility needs within 3 working days.

### **Supplemental Material**

#### **Drivers of and Obstacles to the Adoption of Toxicogenomics for Chemical Risk Assessment: Insights from Social Science Perspectives**

Guillaume Pain, Gordon Hickey, Matthieu Mondou, Doug Crump, Markus Hecker, Niladri Basu, and Steven Maguire

#### **Table of Contents**

**Table S1.** Quality control criteria employed in this study.

**Table S2.** Peer-reviewed journals included in data collection.

**Table S3.** Books included in data collection.

**Table S4.** Authoritative national sources, specialized associations, and international institutions included in data collection.

**Table S5.** Sources making up the corpus of texts analyzed.

**Table S6.** First, median, and last year of mention of drivers and obstacles.

#### **References**

**Additional File-** Excel Document
